# Supplementary material
Source: publisher figshare collection journal article supplement (https://tandf.figshare.com/ndownloader/files/19834271)
Supplement: Supplementary file 1 [file 19834271]

# APPENDIX

## A. Description of the Accident

Table A1. The information about the pedestrian, injuries caused by the analysed accident, and the vehicle involved in the accident.

| **Pedestrian & injuries** | | | | | **Vehicle** | | | | |
| --- | --- | --- | --- | --- | --- | --- | --- | --- | --- |
| Gender | Age | Height  (cm) | Weight  (kg) | Brain injury description a | Vehicle  type | Manufacturer | Vehicle  model | Model  Year | Mass  (kg) |
| Male | 56 | 170 | 65 | DAI diffuse axonal injury: AIS4,  subarachnoid hemorrhage: AIS3  epidural hematoma: AIS3 | Small  Passenger  Car | FAW-  Volkswagen | Bora | 2011 | 1610 |

a AIS: Abbreviated Injury Scale, the most commonly used injury code to assess the severity of human body injuries ([AAAM, 2008](#_ENREF_1))

## B. Coupling Procedure


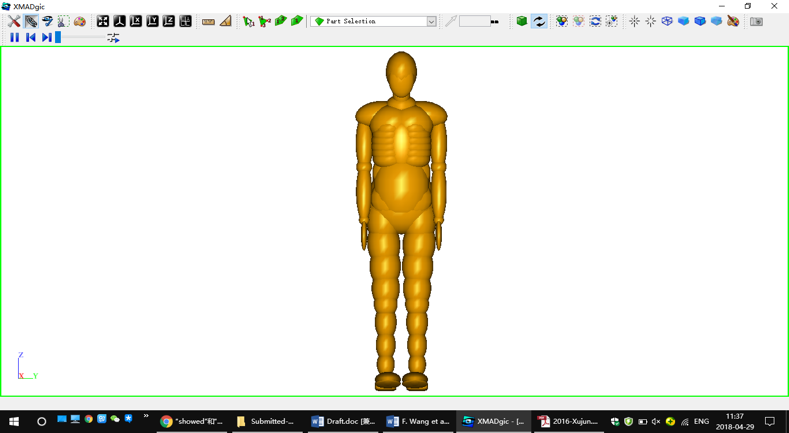

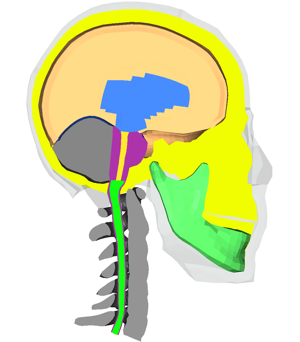


(a) (b)

(c) (d)

Figure B1. (a) MB Pedestrian model; (b) Sectional view of the THUMS head-neck FE model; (c) Coupled model for accident reconstruction created in this study; (d) Connection between the FE and MB models. The connection areas (indicated using circles) are clavicular bones and the first thoracic vertebra (T1).

## C. Finite Element Procedures Used

THUMS FE head-neck model was constructed using underintegrated eight-noded hexahedral elements — the most efficient and robust element type for explicit dynamics FE analysis (see reference [E8] in Appendix: Section E). As eight-noded hexahedral elements exhibit artificial zero-energy (or hourglassing) modes, we used viscous form Flanagan-Belytschko hourglass control (see references [E9] and [E10] in Appendix: Section E). We followed the recommendations formulated by Yang and Mao (see reference [E8] in Appendix: Section E) that for FE models for injury biomechanics the ratio of hourglass energy to total energy should be less than 10%. We used the hourglass coefficient of 0.1, which allowed us to maintain this energy ratio and prevent hourglassing. It should be noted that the requirements we used are stricter than in the recently introduced Euro NCAP protocol (see reference [E11] in Appendix: Section E) for certification of the human body models that allows for up to 15% of the artificial energy (contact energy and hourglass energy) to the total energy ratio.

Explicit dynamics FE analysis is only conditionally stable with the time step (referred to in the literature as critical time step) required for stable computations determined by Courant criterion (see reference [E12] in Appendix: Section E). We followed an established practice of reducing the computation time by increasing the critical time step through mass scaling (i.e. increasing the mass density for the selected elements in the model) (see references [E12] and [E13] in Appendix: Section E). We used mass scaling to increase the critical time step to 1 μs — a value sufficiently short for the brain injury analysis (see reference [E13] in Appendix: Section E) and resulting in only 0.7% of the head-neck model mass increase.

## D. Simulation Results

(a)

(b)

(c)

Figure D1. Comparison of the vehicle deformations recorded in IVAC accident database and the predicted locations of impacts between the pedestrian and vehicle. (a) The impact locations determined from observation of the vehicle deformations at the accident scene (IVAC database); (b) The predicted impact location between the pedestrian upper leg (thigh) and left bonnet edge (indicated using a red circle); (c) The predicted impact location between the pedestrian head and windscreen (indicated using a blue circle). (b) left and (c) left: the results obtained using purely MB pedestrian model; (b) right and (c) right: the results obtained using coupled FE-MB pedestrian model.

(a)

(b)

(c)

Figure D2. Comparison of trajectories of the major body regions relative to the car using the coupled FE-MB model and purely MB model. (a) Head COG; (b) Sternum; (c) Hip. Head COG, sternum and hip rest positions indicate the predicted rest positions at the end of impact. Blue dots denote the rest positions determined from the accident scene in the IVAC database. Black dots denote the rest positions predicted using the coupled FE-MB model. Gray dots denote the rest positions predicted using the purely MB model.

Figure D3. Time histories of the iCSDM0.25 predicted in this study.

(a)

(b)

Figure D4. Comparison of the upper bounds of the brain tissue (a) maximum principal strain and (b) maximum shear strain predicted in this study using coupled FE-MB and head-only FE models. The plots in the figure report the volumetric percentage (i.e. relative volume in percents) of brain tissue (abscissa axis) for which the strain is not greater than a given value shown on the ordinate axis. For the coupled FE-MB model, the results are presented separately for the primary (with the windscreen) and secondary (with the road surface) impacts. As the FE head-only model did not predict the secondary impact, for this model, the results are shown for the entire impact duration.

(a)

(b)

Figure D5. The results obtained using coupled FE-MB model: maximum principal stress distribution in the skull at the time when the largest value is observed. (a): Oblique view; (b) Right side view. Red circles indicate the area where the maximum principal stress exceeds the fracture tolerance.

Figure D6. Predicted contact force between the pedestrian head and windscreen using the coupled FE-MB model and head-only FE model.

(a)

(b)

Figure D7. Comparison of time histories of the iCSDM0.15 (a) and iCSDM0.25 (b) predicted using the coupled FE-MB model (see Figure 2 and Figure D3) and head-only FE model (skull treated as rigid) with the kinematics prescribed for the entire duration of the analysed impact. In the coupled FE-MB model, the constitutive behaviour of the skull bones was represented using elastic-plastic material model.

## E. Bibliography

1. Li G, Wang F, Otte D, Cai Z, Simms C. Have Pedestrian Subsystem Tests Improved Passenger Car Front Shape? Accid Anal Prev. 2018; 115: 143-150.
2. Weng Y, Jin X, Zhao Z, Zhang X. Car-to-Pedestrian Collision Reconstruction with Injury as an Evaluation Index. Accid Anal Prev. 2010; 42(4): 1320-1325.
3. Yang J, Lövsund P, Cavallero C, Bonnoit J. A Human-Body 3D Mathematical Model for Simulation of Car-Pedestrian Impacts. Traffic Inj Prev. 2000; 2(2): 131-149.
4. Versace J. A Review of the Severity Index. Paper presented at: Stapp Car Crash Conference; 1971.
5. NHTSA. 2010. Federal Motor Vehicle Safety Standards: Occupant Crash Protection. National Highway Traffic Safety Administration, USA.
6. Wang F, Geng Z, Agrawal S, Han Y, Miller K, Wittek A. Computation of Brain Deformations Due to Violent Impact: Quantitative Analysis of the Importance of the Choice of Boundary Conditions and Brain Tissue Constitutive Model, In: Wittek A, Joldes G, Nielsen PMF, Doyle BJ, Miller K, eds. Computational Biomechanics for Medicine. New York: Springer; 2017a: 159-173.
7. Wang F, Han Y, Wang B, Peng Q, Huang X, Miller K, Wittek A. Prediction of Brain Deformations and Risk of Traumatic Brain Injury due to Closed-Head Impact: Quantitative Analysis of the Effects of Boundary Conditions and Brain Tissue Constitutive Model. Biomech Model Mechan. 2018; 17(4): 1165-1185.
8. Yang KH, Mao H. Modelling of the Brain for Injury Simulation and Prevention, In: Miller K, eds. Biomechanics of the Brain. New York: Springer, Cham; 2019: 97-133.
9. Flanagan D, Belytschko T. A Uniform Strain Hexahedron and Quadrilateral with Orthogonal Hourglass Control. International Journal for Numerical Methods in Engineering. 1981; 17(5): 679-706.
10. Joldes GR, Wittek A, Miller K. An Efficient Hourglass Control Implementation for the Uniform Strain Hexahedron Using the Total Lagrangian Formulation. Communications in Numerical Methods in Engineering. 2008; 24(11): 1315-1323.
11. Klug C, Ellway J. 2018. Pedestrian Human Model Certification Version 1.1. Euro NCAP.
12. Cook RD, Malkus DS, Plesha ME. Finite elements in dynamics and vibrations, eds. Concepts and Applications of Finite Element Analysis. New York: John Wiley & Sons; 1989: 367-428.
13. King AI. The Biomechanics of Impact Injury: Biomechanical Response, Mechanisms of Injury, Human Tolerance and Simulation. Springer International Publishing; 2018.
